1 **Biogeographic position and body size jointly set lower**  
2 **thermal limits of wandering spiders**

3 Jérémy Monsimet<sup>1</sup>, Hervé Colinet<sup>2</sup>, Olivier Devineau<sup>1</sup>, Denis Lafage<sup>2,3</sup>, and Julien  
4 Pétillon<sup>2</sup>

5 <sup>1</sup> Department of Forestry and Wildlife management, Inland Norway University of Applied  
6 Sciences, Campus Evenstad, Koppang, Norway

7 <sup>2</sup> UMR CNRS 6553 ECOBIO, Université de Rennes, Rennes, France

8 <sup>3</sup> Department of Environmental and Life Sciences/Biology, Karlstad University, Karlstad,  
9 Sweden

10 Correspondence: [Jérémy Monsimet <jeremy.monsimet@inn.no>](mailto:j Jeremy.monsimet@inn.no)

## 11 **Abstract**

12 Most species encounter large variations in abiotic conditions along their distribution  
13 range. Climate, and in particular temperature, varies along clinal gradients, which  
14 determines phenotypic plasticity, local adaptations and associated physiological  
15 responses of most terrestrial ectotherms, such as insects and spiders. This study aimed  
16 to determine how the biogeographic position of populations and the body size of two  
17 wandering spiders set their limits of cold (freezing) resistance. Using an ad-hoc design,  
18 we sampled relatively large numbers of individuals from four populations of *Dolomedes*  
19 *fimbriatus* and one population of the sister species *Dolomedes plantarius* originating  
20 from contrasting climatic areas (temperate and continental climate), and compared their  
21 supercooling ability as an indicator of cold resistance. Results indicated that spiders  
22 from northern (continental) populations had higher cold resistance than spiders from a  
23 southern (temperate) populations. Larger spiders had a lower supercooling ability in  
24 northern populations. The red-listed and rarest *D. plantarius* was slightly less cold-  
25 tolerant than the more common *D. fimbriatus*, and this might be of importance in a  
26 context of climate change that could imply colder overwintering habitats in the north due  
27 to reduced snow cover protection.

28 **Keywords:** Supercooling ability; fishing spiders; freezing; climate change; *Dolomedes*

## 29 **Introduction**

30 The ability of a species to cope with variations in abiotic conditions influences its  
31 distribution range (Gaston 2003). Abiotic factors, and among them temperature, shape  
32 the geographic range of ectotherm species, and this is even more relevant in the  
33 context of global warming (Somero 2012, Addo-Bediako et al. 2000). Some ectotherms  
34 survive freezing and are freeze tolerant whereas other ectotherms are freeze intolerant.  
35 Freezing tolerant species, like some alpine species, tend to freeze at relatively high  
36 subzero temperatures with ice nucleators and cryoprotectants, inducing and protecting  
37 against freezing stress respectively, instead of having high supercooling abilities, i.e.  
38 low supercooling point (SCP) (Duman 2001, Bale 2002, Duman et al. 2004). Freeze  
39 intolerant arthropods, which include freeze-avoidant, chill tolerant, chill-susceptible and  
40 opportunistic-survival classes, can exhibit deep supercooling ability, ranging from -15 to  
41 -25°C (Danks 2004), by producing polyols and antifreeze proteins (Duman 2001, Bale  
42 2002).

43 Many different measures are used to illustrate the thermal performance of populations  
44 (Sinclair et al. 2015). It could be depicted by a thermal performance curve representing  
45 how a temperature gradient influences arthropod activity (Sinclair et al. 2012, 2015). As  
46 the estimation of thermal performances is influenced by many factors such as  
47 phenotypic plasticity (Schulte et al. 2011) or evolutionary adaptation (Jensen et al.  
48 2019), measuring an anchor point like the SCP is useful to assess the cold tolerance

49 class of species. Indeed, the SCP represents the lower lethal temperature (LLT) for  
50 freezing-avoidant species and is still a useful indicator for chill-tolerant species as SCP  
51 and LLT are almost similar for them (Bale 1996). However, many ectotherms classified  
52 as chill-susceptible or opportunistic-survival, die at temperatures well above SCP, the  
53 latter being less resistant than the former (Overgaard and MacMillan 2017, Bale 2002).  
54 Even though the ecological value of the SCP has been debated (Renault et al. 2002,  
55 Ditrich et al. 2018), it is still a useful metric to explore and describe the cold tolerance  
56 strategy of poorly studied species, such as spiders (Sinclair et al. 2015).

57 Latitude and winter conditions influence the temperature gap between the SCP and the  
58 lower lethal temperature (Addo-Bediako et al. 2000, Vernon and Vannier 2002). Indeed,  
59 based on cold hardiness strategies defined by Bale (1996), opportunistic-survival  
60 animals are mainly found in tropical and semi-tropical regions, chill susceptible and chill-  
61 tolerant in temperate and sub-polar regions and freeze avoidant in region with severe  
62 cold winter conditions.

63 Body size influences and is influenced by the animal's stage, its body fat content or the  
64 concentration of ice-nucleating bacteria, which affect the SCP (David and Vannier 1996,  
65 Johnston and Lee 1990, Colinet et al. 2007). The size of animals also changes along  
66 latitudinal and altitudinal clines. Both an increase and a decrease of body size towards  
67 northern latitude were observed and theorised under the Bergmann and converse  
68 Bergmann rules respectively (Blanckenhorn and Demont 2004). For ectotherms, these  
69 two rules were first opposed (Voorhies 1996, Mousseau 1997) but it seems that both

70 larger and smaller individuals at northern latitudes is possible and the two rules are  
71 eventually not exclusive (Blanckenhorn and Demont 2004), possibly co-existing in close  
72 species (e.g. in arctic wolf spiders, see Ameline et al. 2018). The latitudinal size cline is  
73 of importance as body size also influences cold hardiness (Ansart et al. 2014), e.g. with  
74 smaller arthropods having better supercooling capabilities than larger ones (Sømme  
75 1982, David et al. 1996, Colinet et al. 2007, Sinclair et al. 2009). Hence, a negative  
76 relationship between ectotherms size and the ability to supercool has been reported  
77 (Lee and Costanzo 1998). Consequently, smaller individuals could benefit from colder  
78 temperatures under harsher winter conditions at northern latitudes.

79 Most studies investigating latitudinal clinal changes of arthropods' physiological  
80 tolerance focused on differences between species rather than among populations of the  
81 same species (Spicer and Gaston 1999 but see, e.g. Jensen et al. 2019). Physiological  
82 tolerance is a basal trait in arthropods, but it has evolved many times (Sinclair et al.  
83 2003). Most of the knowledge on cold tolerance of arthropods comes from the study of  
84 insects, and different mechanisms might influence the cold hardiness of insects and  
85 arachnids. Indeed, Anthony and Sinclair (2019) showed divergent cryoprotective  
86 dehydration, the action of losing water by evaporation at low temperature, between  
87 insects and arachnids and the absence of coma under hypoxic conditions is also  
88 remarkable in spiders (Pétillon et al. 2009). To our knowledge, not all spiders are  
89 freezing tolerant (Nentwig 2012). The same cold hardiness classes are used to

90 categorise freezing intolerance of spiders and insects. Indeed, some spiders are freeze-  
91 avoidant, others chill-tolerant or chill susceptible (Kirchner 1973, Anthony et al. 2019).

92 Although latitudinal variations in the cold hardiness of arachnids have been the subject  
93 of recent attention (e.g. Anthony et al. 2019), studies comparing populations within  
94 species are lacking (but see e.g. Murphy et al. 2008), this despite the recognised  
95 importance of comparative approaches (e.g. see Ansart et al. 2014). Tough sampling  
96 conditions at high latitude in the northern hemisphere may limit sampling of a sufficient  
97 number of individuals and thus prevent studies from considering the northern part of a  
98 species range.

99 In this study, we assessed the variation in cold resistance, estimated through SCP  
100 ability of different populations and species of fishing spiders (Araneae, Pisauridae) with  
101 contrasted distributions. We hypothesised that (i) northern populations of *Dolomedes*  
102 *fimbriatus* have lower SCP values than southern populations, (ii) the size of spider in the  
103 north is positively related to the SCP, and (iii) the species reaching the northern  
104 latitudes (here *D. fimbriatus*) has lower SCP values than the more southern limited  
105 species (*D. plantarius*: Monsimet et al. 2020), potentially due to their relatively smaller  
106 body size. These hypotheses were experimentally tested in two European *Dolomedes*  
107 species using relatively high numbers of field-collected spiders for representative results  
108 and robust statistics.

## 109 **Materials and Methods**

### 110 **Case study species and sampling locations**

111 The fishing spiders, *Dolomedes plantarius* and *Dolomedes fimbriatus* are widespread in  
112 Europe with a northern range limit in Fennoscandia. *D. plantarius* has a lower  
113 population density and is red-listed at the European scale (World Conservation  
114 Monitoring Centre 1996). The latitudinal contrast encompassed two different  
115 biogeographic positions, characterizing two different climatic areas (continental, coded  
116 C hereafter *versus* temperate, coded T). Individuals sampled at their range limit were  
117 compared with others from a central latitude of the distribution. We sampled two sites  
118 with *D. fimbriatus* and one site with *D. plantarius* in Fennoscandia (C1, C2 and C3; fig.  
119 1), which characterise the northern population, subject to a continental climate. In  
120 addition, we sampled two sites with *D. fimbriatus* in France (T1 and T2; fig. 1),  
121 representing the centrally distributed populations exposed to a temperate climate. Given  
122 the conservation status of *D. plantarius* in Europe, we chose to limit our sampling of this  
123 species to the area where it is most abundant (Fennoscandia).

124 As the SCP is influenced by the developmental stage (Aitchison 1984, Anthony et al.  
125 2019), we sampled only juvenile spiders of both sexes. The peak of the breeding  
126 season of European *Dolomedes* is in late July (Smith 2000). Females keep egg sacs  
127 several weeks before building a nursery web where eggs will hatch and from which  
128 spiderlings will later spread out into the surroundings. Juvenile spiders overwinter, but

129 not adults, similarly to other species in the genus (Guarisco 2010). We sampled *D.*  
130 *fimbriatus* by sweep-netting the vegetation on sunny and windless days. We sampled *D.*  
131 *plantarius* on the water surface by visual hunting, and active hunting by perturbing the  
132 water surface. We sampled, and latter tested the SCP of about 24 spiders at each  
133 sampling site ( $n = 24,24,21,26,24$  for C1,C2,C3,T1,T2 respectively, table 1).

## 134 **Measurement of the supercooling point**

135 To determine the SCP, we placed the spiders in centrifuge tubes, which were  
136 submerged in a cryostat bath (Polystat CC3, Huber Kältemaschinenbau AG, Germany)  
137 filled with heat transfer fluid (Thermofluid SilOil, Huber, Germany). The temperature of  
138 the bath was slowly reduced at a rate of  $0.5^{\circ}\text{C min}^{-1}$  to reach a target temperature of -  
139  $30^{\circ}\text{C}$ . To monitor the temperature of the spiders, we placed a K-type thermocouple in  
140 direct contact with the spider opisthosoma, secured with Parafilm® and connected to a  
141 Testo 175T3 temperature data logger (Testo SE& Co., Germany). We recorded the  
142 temperature every ten seconds. The SCP was defined as the temperature at the onset  
143 of the freezing exotherm produced by the latent heat (see fig. 2 for representative  
144 exotherms).

145 As the number of spiders tested per day was limited by the capacity of the instrument (4  
146 spiders at a time), we later accounted for the time lag between capture and test in our  
147 models (variable Diff).



## 148 **Measurement of spider body size**

149 We measured the spiders' body size after the SCP experiment to avoid injuring the  
150 spiders and biasing the results. We took a picture of the spider' back together with a  
151 measuring tape for measuring the body size later in the ImageJ software (Schneider et  
152 al. 2012). We measured the highest length and largest width of the carapace (prosoma)  
153 which are commonly used as proxy for whole body size, fitness and metabolic rate in  
154 spiders (Jakob et al. 1996, Penell et al. 2018).

## 155 **Data treatment**

156 The carapace width and length were highly correlated ( $\rho = 0.83$ , Pearson correlation  
157 test), so we used the carapace length as a proxy of body size (Jakob et al. 1996) and  
158 referred to as body size hereafter.

## 159 **Comparison of SCP across latitudes (*D. fimbriatus*)**

160 We used the data from the four *D. fimbriatus* populations to assess the effect of latitude,  
161 and called the model "modClim" in the following. We modelled the SCP with several  
162 candidate linear models including predictor variables Diff (time between capture and  
163 SCP measurements), site, climate (continental/temperate, as defined by the  
164 biogeographic location), sex and body size. We also considered the interaction between  
165 climate and body size and/or the interaction between body size and site (See appendix  
166 1 for the list of candidate models).

## 167 **Comparison of SCP between species (northern populations)**

168 We used *D. fimbriatus* and *D. plantarius* from Scandinavia to compare the SCP of  
169 species from northern populations, and called the model modSp in the following. We  
170 modelled the SCP with several candidate linear models with variables Diff, site, species,  
171 sex and body size, as well as the interaction between species and body size and/or the  
172 interaction between body size and site (See appendix 2 for the list of candidate models).

## 173 **Statistical Analysis**

174 We used packages rstanarm (Goodrich et al. 2020), modelbased (Makowski et al. 2020)  
175 and bayestestR (Makowski et al. 2019a) in R (R Core Team 2020) to fit the linear  
176 models in a Bayesian framework. We used a normal distribution centred on 0 and a  
177 standard deviation of 2.5 as weakly informative priors (rather than using flat priors, see  
178 Gelman et al. 2008, Gelman and Shalizi 2013). We fitted the models using four chains  
179 and 4000 iterations. We used leave-one-out-cross-validation value (LOO value) to  
180 compare the predictive accuracy of fitted models, and to select the most accurate model  
181 (Vehtari et al. 2017). We checked the convergence of the models both visually and by  
182 making sure that Rhat value was not larger than 1.1 (Gelman and Rubin 1992).

183 Following Makowski et al. (2019b), we used the probability of direction (pd), which is the  
184 probability that the posterior distribution of a parameter is strictly positive or negative, to  
185 describe the existence of an effect of an explanatory variable. We used the percentage

186 of the full region of practical equivalence (ROPE) lower than 1% as an index of the  
187 significance of an effect. We represented the uncertainty with a credible interval of 89%.

## 188 **Results**

### 189 **General results**

190 The SCP of the spiders varied from  $-2.6$  to  $-16.4^{\circ}\text{C}$ , with an average of  $-7.8 \pm 2.3^{\circ}\text{C}$   
191 ( $n=119$ ). Fig. 2 shows typical cooling curves of *Dolomedes fimbriatus* (from C2) and  
192 *Dolomedes plantarius* (from C3) with exotherms of about  $8$  and  $6.5^{\circ}\text{C}$  and a SCP of  $-9.3$   
193 and  $-7.5^{\circ}\text{C}$  respectively. None of the spiders tested survived freezing.

194 The body size of juveniles of *D. plantarius* was on average  $5.36 \pm 0.69\text{mm}$  while body  
195 size of *D. plantarius* was  $4.28 \pm 0.56\text{mm}$  in the South and  $4.53 \pm 0.47\text{mm}$  in the South.

### 196 **Validation and selection of models**

197 All of our candidate models converged ( $R_{\text{hat}} < 1.1$ ). According to LOO values, some  
198 models were considered equivalent (Appendices 1 & 2). The modClim model with the  
199 lowest LOO value and therefore the highest predictive power included variables Diff  
200 (time between capture and test), climate, body size and the interactive effect of climate  
201 and body size (table 2). For modSp model, the best model included Diff, species, body  
202 size and the interactive effect of body size and species.

## 203 **Comparison of SCP across latitudes (*D. fimbriatus*)**

204 Regarding modClim (table 2), the SCP of individuals of southern and northern  
205 populations significantly differed (pd = 99%, <1% in ROPE, fig. 3) and were  $-6.6 \pm 2.3^\circ\text{C}$   
206 (min.  $-11.5^\circ\text{C}$ , max.  $-2.6^\circ\text{C}$ ; n=50) and  $-9.05 \pm 2.31^\circ\text{C}$  (min.  $-6.30^\circ\text{C}$ , max.  $-2.30^\circ\text{C}$ ,  
207 n=48), respectively. The SCP significantly increased with the spider's body size (pd =  
208 96%, <1% in ROPE, median = 8.4 [0.6; 16.5]), which means that larger spiders had  
209 higher SCP than smaller spiders. The effect of spiders' body size on the SCP was  
210 significantly different between the two climatic areas (pd = 98%, <1% in ROPE; fig. 4).  
211 Namely, the SCP increased with the body size of spiders in the northern climate (pd =  
212 96%, <1% in ROPE, median = 8.33 [0.15; 15.56]) while the relation between SCP and  
213 body size in the South was not different from 0 (<1% in ROPE but pd < 90%).

## 214 **Comparison of SCP between species (northern populations)**

215 Regarding modSp (table 3), the SCP significantly increased with body size of both  
216 species together (pd = 98%, <1% in ROPE, Median = 9.1 [2.0; 15.9]; fig. 5).  
217 Nonetheless, the effect of body size on the SCP was not different between species (pd  
218 = 93%). The SCPs of individuals of *D. plantarius* and *D. fimbriatus* of northern  
219 populations likely differed (pd = 95%, 1%<ROPE<2.5%) and was  $-7.56 \pm 0.32$  (min.  
220  $-9.4^\circ\text{C}$ , max.  $-4.4^\circ\text{C}$ ; n=21) for *D. plantarius* (for *D. fimbriatus*, see above). We did not  
221 find a significant effect of Diff for modSp (ROPE = 23%).

## 222 Discussion

223 Our study showed that the SCP of northern fishing spiders from a continental climate  
224 was lower than the SCP of southern *Dolomedes* from a temperate climate. The SCP  
225 was positively related to body size for both species, but this relationship differed  
226 between the two climates for *D. fimbriatus*. Finally, we found that the SCP of  
227 *Dolomedes fimbriatus* was slightly lower than that of *Dolomedes plantarius*.

228 The SCP of *D. fimbriatus* decreased with increasing latitude, while juveniles of the  
229 species did not differ in size. In this study, we tested four populations from two  
230 biogeographic locations which characterised different climates and latitudes along the  
231 species distribution range. The northern populations, at the range limit, experience cold  
232 winters with permanent snow cover, whereas the southern populations, from a more  
233 central latitude of the range, experience warmer winters with only rarely a snow cover.  
234 The northern and southern locations are characterised by temperate and continental  
235 climate respectively (Kottek et al. 2006) and the corresponding range of temperatures  
236 might explain the decrease in SCP towards the North. Indeed, temperature influences  
237 cold hardiness in arthropods, including spiders (Nentwig 2012) and a poleward increase  
238 in thermal tolerance is observed in many ectotherms (Sunday et al. 2011). An  
239 acclimation to warmer temperatures, as for southern spiders, can also reduce the  
240 tolerance to cold conditions (Jensen et al. 2019). At the same time, northern spiders  
241 could benefit from their cold acclimation by being more active during cooler periods in

242 summer (Everatt et al. 2013). The diurnal range also differs along the latitudinal  
243 gradient; i.e. northern populations stand more substantial variation in the diurnal activity  
244 range.

245 The impact of diurnal activity range, together with temperature, are essential cues to  
246 determine the cold resistance of ectotherm arthropods (e.g. soil dwelling collembolan  
247 *Orchesella cincta* see Jensen et al. 2019, or Paaijmans et al. 2013, Seebacher et al.  
248 2015). These might have impacted spiders differently at the time of our experiments  
249 (late summer/ early autumn), as northern *Dolomedes* are confronted to earlier and  
250 harsher winter. These two cues have been shown to impact the overwintering of  
251 another *Dolomedes* species, from North America (*D. triton*; Spence and Zimmermann  
252 1998), and might similarly impact the overwintering of *D. fimbriatus*. To our knowledge,  
253 *Dolomedes* species are inactive during winter (Aitchison 1984). Schmidt (1957) noted  
254 that *D. fimbriatus* overwinters twice before reaching the adult stage. He also noted that  
255 juveniles spend the winter in dry vegetation at high strata, which is probably the  
256 overwintering habitat of the southern spiders we tested here. However, the northern  
257 *Dolomedes* we tested endure temperatures colder than the SCP measured in this study.  
258 For this reason, we hypothesised that, similarly to *Dolomedes triton* in Canada (Spence  
259 and Zimmermann 1998), spiderlings and juveniles overwinter under the snow. Indeed,  
260 the temperature in the subnivean layer, which is between the soil surface and the base  
261 of the snowpack, is warmer and more stable than the air temperature above the snow,  
262 and protect species from temperatures lower than their SCP (Marchand 1982).

263 *Dolomedes*, like other spider species, are not freezing tolerant as none of the spiders  
264 tested survived freezing. Cold-hardiness of *Dolomedes* is important for winter survival.  
265 Based on the cold hardiness classification of Bale (1996) and Bale (2002) (see also  
266 appendix 3 for a summarised classification), we hypothesise that *Dolomedes*, at least  
267 from the northern populations, are either chill-susceptible or freeze-avoidant. The main  
268 difference between these two cold hardiness classes is the ability to survive damages  
269 caused by cold injuries. Freezing-avoidant species survive until freezing, while chill-  
270 tolerant die sooner due to chill injuries. Spiders from a close family (*Pardosa*,  
271 Lycosidae) at northern latitudes are from the same cold hardiness class (Anthony and  
272 Sinclair 2019). Nonetheless, we only tested the SCP and more measurements, such as  
273 the lower lethal temperature, would be necessary to define the cold hardiness class  
274 more precisely. The cold hardiness class of *Dolomedes* might also vary between the  
275 two biogeographic positions as demonstrated for the butterfly *Piries rapae* which is  
276 either freeze-tolerant or freezing-avoidant depending on the latitude (Li and  
277 Zachariassen 2007).

278 Even if *Dolomedes* from the two areas did not differ in body size, we found an overall  
279 decrease of the SCP with increasing spider body size. Smaller individuals being more  
280 cold tolerant than bigger ones is a general trend for ectotherm animals (e.g. for ants see  
281 Hahn et al. (2008), for beetles see Johnston and Lee (1990)). This trend is also  
282 observed for spiders with smaller instars being more tolerant to cold than larger

283 juveniles and adults (Almquist 1970, Bayram and Luff 1993), and it might explain our  
284 extreme SCP measures down to  $-16.8\text{ }^{\circ}\text{C}$  for one *D. fimbriatus* from Fennoscandia.

285 The decline in supercooling abilities with increasing latitude was nonetheless not  
286 observed in southern *D. fimbriatus*. The size of southern spiders, that have higher SCP,  
287 seemed to be less related to SCP. This difference in strategy between temperate and  
288 colder habitats has been reported in other species from the closely-related family of  
289 Lycosidae (Ameline et al. 2018). The northern spiders have a shortened breeding  
290 season, which can impact life history traits such as body size (Bowden et al. 2015). The  
291 smaller fishing spiders under continental climate could be advantaged as they can  
292 survive colder winters. After the winter, northern fishing spiders could accelerate their  
293 development because cold-adapted ectotherms have a higher metabolic rate in an  
294 environment with limited energy (Sinclair et al. 2012).

295 We found slightly higher resistance to cold temperature in *D. fimbriatus* compared to *D.*  
296 *plantarius* (for populations at similar latitudes), which might be partly due to the smaller  
297 size of *D. fimbriatus*. In turn, this difference between species might explain the wider  
298 northward distribution of *D. fimbriatus* compared to that of *D. plantarius*. It indeed  
299 appears that specialist species are larger under harsher conditions because they are  
300 more adapted to their environment (Ameline et al. 2018). A larger size implies a smaller  
301 cold resistance here, which might be detrimental in this case. Nonetheless, the SCPs  
302 measured in this study were close to those measured for phylogenetically close spiders



303 (from the same Lycosoidea superfamily) from northern latitudes (Anthony and Sinclair  
304 2019). These values are considered as medium cold resistance (Nentwig 2012).

305 Climate change impacts spiders in various ways. At northern latitudes, subnivean layer  
306 is supposedly a non-freezing environment with quite stable temperatures (Pruitt 1957)  
307 but snow density and length of the snow season impacts the stability of these conditions  
308 (Pauli et al. 2013, Bale and Hayward 2010). While air temperature increases with  
309 climate change, the subnivean layer may become colder (Wipf and Rixen 2010). This  
310 paradox is already negatively impacting invertebrates (Williams et al. 2015, Slatyer et al.  
311 2017). Even though we found that fishing spiders from continental climate tolerated  
312 colder temperatures than spiders from temperate climate, the lowest SCP was higher  
313 than the lowest air temperature measured historically in Fennoscandia. A weakened  
314 subnivean shelter could negatively impact northern populations and even more so for  
315 the rare *D. plantarius* which is less cold resistant. Another impact of the increased  
316 length of the snow free season could be a second clutch in northern *Dolomedes*, as  
317 reported in the arctic Lycosidae *Pardosa glacialis* (Høye et al. 2020).

318 We found that the cold tolerance of fishing spiders varied among populations, between  
319 climates and between species. Nonetheless, the difference in SCP between the two  
320 species was not striking. Sample another population of *D. plantarius* could support the  
321 slight difference found between species, but we tried to limit the impact of sampling on  
322 populations of this red-listed species (World Conservation Monitoring Centre 1996).  
323 Moreover, we assessed cold tolerance based on measuring the SCP only and from

324 spiders sampled in late summer / early autumn. Sampling *Dolomedes* is challenging  
325 especially at northern latitudes in winter. Nonetheless, studying life history traits like  
326 cold resistance is valuable to explore and predict the distribution of understudied  
327 invertebrates (Mammola et al. 2020), especially by integrating ecophysiology of species.

## 328 **References**

- 329 Addo-Bediako, A., S. L. Chown, and K. J. Gaston. 2000. Thermal tolerance, climatic  
330 variability and latitude. *Proceedings of the Royal Society B: Biological Sciences*  
331 267:739–745.
- 332 Aitchison, C. W. 1984. Low Temperature Feeding by Winter-Active Spiders. *Journal of*  
333 *Arachnology* 12:297–305.
- 334 Almquist, S. 1970. Thermal tolerances and preferences of some dune-living spiders.  
335 *Oikos* 21:230–235.
- 336 Ameline, C., C. Puzin, J. J. Bowden, K. Lambeets, P. Vernon, and J. Pétilion. 2018.  
337 Habitat specialization and climate affect arthropod fitness: A comparison of  
338 generalist vs. Specialist spider species in Arctic and temperate biomes.  
339 *Biological Journal of the Linnean Society* 121:592–599.
- 340 Ansart, A., A. Guiller, O. Moine, M.-C. Martin, and L. Madec. 2014. Is cold hardiness  
341 size-constrained? A comparative approach in land snails. *Evolutionary Ecology*  
342 28:471–493.

- 343 Anthony, S. E., C. M. Buddle, T. T. Høye, and B. J. Sinclair. 2019. Thermal limits of  
344 summer-collected *Pardosa* wolf spiders (Araneae: Lycosidae) from the Yukon  
345 Territory (Canada) and Greenland. *Polar Biology* 42:2055–2064.
- 346 Anthony, S. E., and B. J. Sinclair. 2019. Overwintering red velvet mites are freeze  
347 tolerant. *Physiological and Biochemical Zoology* 92:201–205.
- 348 Bale, J. S. 1996. Insect cold hardiness: A matter of life and death. *European Journal of*  
349 *Entomology* 93:369–382.
- 350 Bale, J. S. 2002. Insects and low temperatures: From molecular biology to distributions  
351 and abundance. *Philosophical Transactions of the Royal Society of London.*  
352 *Series B: Biological Sciences* 357:849–862.
- 353 Bale, J. S., and S. a. L. Hayward. 2010. Insect overwintering in a changing climate.  
354 *Journal of Experimental Biology* 213:980–994.
- 355 Bayram, A., and M. L. Luff. 1993. Cold-hardiness of wolf-spiders (Lycosidae, Araneae)  
356 with particular reference to *Pardosa pullata* (Clerck). *Journal of thermal biology.*
- 357 Blanckenhorn, W. U., and M. Demont. 2004. Bergmann and converse Bergmann  
358 latitudinal clines in arthropods: Two ends of a continuum? *Integrative and*  
359 *Comparative Biology* 44:413–424.

- 360 Bowden, J. J., R. R. Hansen, K. Olsen, and T. T. Høye. 2015. Habitat-specific effects  
361 of climate change on a low-mobility Arctic spider species. *Polar Biology* 38:559–  
362 568.
- 363 Colinet, H., P. Vernon, and T. Hance. 2007. Does thermal-related plasticity in size and  
364 fat reserves influence supercooling abilities and cold-tolerance in *Aphidius*  
365 *colemani* (Hymenoptera: Aphidiinae) mummies? *Journal of Thermal Biology*  
366 32:374–382.
- 367 Danks, H. V. 2004. Seasonal adaptations in Arctic insects. *Integrative and*  
368 *Comparative Biology* 44:85–94.
- 369 David, J.-F., M.-L. Célérier, and G. Vannier. 1996. Overwintering with a low level of  
370 cold-hardiness in the temperate millipede *Polydesmus angustus*. *Acta*  
371 *Oecologica* 17:393–404.
- 372 David, J.-F., and G. Vannier. 1996. Changes in supercooling with body size, sex, and  
373 season in the long-lived millipede *Polyzonium germanicum* (Diplopoda,  
374 Polyzonidae). *Journal of Zoology* 240:599–608.
- 375 Ditrich, T., V. Janda, H. Vaněčková, and D. Doležel. 2018. Climatic variation of  
376 supercooling point in the Linden Bug *Pyrrhocoris apterus* (Heteroptera:  
377 Pyrrhocoridae). *Insects* 9:144.

- 378 Duman, J. G. 2001. Antifreeze and ice nucleator proteins in terrestrial arthropods.  
379 Annual Review of Physiology 63:327–357.
- 380 Duman, J. G., V. Bennett, T. Sformo, R. Hochstrasser, and B. M. Barnes. 2004.  
381 Antifreeze proteins in Alaskan insects and spiders. Journal of Insect Physiology  
382 50:259–266.
- 383 Everatt, M. J., J. S. Bale, P. Convey, M. R. Worland, and S. A. L. Hayward. 2013. The  
384 effect of acclimation temperature on thermal activity thresholds in polar  
385 terrestrial invertebrates. Journal of Insect Physiology 59:1057–1064.
- 386 Fick, S. E., and R. J. Hijmans. 2017. WorldClim 2: New 1-km spatial resolution climate  
387 surfaces for global land areas. International Journal of Climatology 37:4302–  
388 4315.
- 389 Gaston, K. J. 2003. The structure and dynamics of geographic ranges. Oxford  
390 University Press.
- 391 Gelman, A., A. Jakulin, M. G. Pittau, and Y.-S. Su. 2008. A weakly informative default  
392 prior distribution for logistic and other regression models. Annals of Applied  
393 Statistics 2:1360–1383.
- 394 Gelman, A., and D. B. Rubin. 1992. Inference from iterative simulation using multiple  
395 sequences. Statistical Science 7:457–472.

- 396 Gelman, A., and C. R. Shalizi. 2013. Philosophy and the practice of Bayesian statistics.  
397 British Journal of Mathematical and Statistical Psychology 66:8–38.
- 398 Goodrich, B., J. Gabry, I. Ali, and S. Brilleman. 2020. Rstanarm: Bayesian applied  
399 regression modeling via Stan.
- 400 Guarisco, H. 2010. The Fishing Spider genus *Dolomedes* (Araneae: Pisauridae) in  
401 Kansas. Transactions of the Kansas Academy of Science 113:35–43.
- 402 Hahn, D. A., A. R. Martin, and S. D. Porter. 2008. Body Size, but Not Cooling Rate,  
403 Affects Supercooling Points in the Red Imported Fire Ant, *Solenopsis invicta*.  
404 Environmental Entomology 37:1074–1080.
- 405 Høye, T. T., J.-C. Kresse, A. M. Koltz, and J. J. Bowden. 2020. Earlier springs enable  
406 high-Arctic wolf spiders to produce a second clutch. Proceedings of the Royal  
407 Society B: Biological Sciences 287:20200982.
- 408 Jakob, E. M., S. D. Marshall, and G. W. Uetz. 1996. Estimating fitness: A comparison  
409 of body condition indices. Oikos 77:61–67.
- 410 Jensen, A., T. Alemu, T. Alemneh, C. Pertoldi, and S. Bahrndorff. 2019. Thermal  
411 acclimation and adaptation across populations in a broadly distributed soil  
412 arthropod. Functional Ecology 33:833–845.
- 413 Johnston, S. L., and R. E. Lee. 1990. Regulation of supercooling and nucleation in a  
414 freeze intolerant beetle (*Tenebrio Molitor*). Cryobiology 27:562–568.

- 415 Kirchner, W. 1973. Ecological aspects of cold resistance in spiders (a comparative  
416 study). Pages 271–279 *in* W. Wieser, editor. Effects of temperature on  
417 ectothermic organisms: Ecological implications and mechanisms of  
418 compensation. Springer, Berlin, Heidelberg.
- 419 Kottek, M., J. Grieser, C. Beck, B. Rudolf, and F. Rubel. 2006. World Map of the  
420 Köppen-Geiger climate classification updated. *Meteorologische Zeitschrift*  
421 15:259–263.
- 422 Lee, R. E., and J. P. Costanzo. 1998. Biological ice nucleation and ice distribution in  
423 cold-hardy ectothermic animals. *Annual Review of Physiology* 60:55–72.
- 424 Li, N., and K. Zachariassen. 2007. Cold hardiness of insects distributed in the area of  
425 Siberian Cold Pole. *Comparative Biochemistry and Physiology Part A: Molecular*  
426 *& Integrative Physiology* 146:S156–S157.
- 427 Makowski, D., M. Ben-Shachar, and D. Lüdecke. 2019a. bayestestR: Describing  
428 effects and their uncertainty, existence and significance within the Bayesian  
429 framework. *Journal of Open Source Software* 4:1541.
- 430 Makowski, D., M. S. Ben-Shachar, S. H. A. Chen, and D. Lüdecke. 2019b. Indices of  
431 effect existence and significance in the Bayesian framework. *Frontiers in*  
432 *Psychology* 10.

- 433 Makowski, D., D. Lüdecke, and M. S. Ben-Shachar. 2020. Modelbased: Estimation of  
434 model-based predictions, contrasts and means. CRAN.
- 435 Mammola, S., J. Pétilion, A. Hacala, J. Monsimet, S.-I. Marti, P. Cardoso, and D.  
436 Lafage. 2020. Challenges and opportunities of species distribution modelling of  
437 terrestrial arthropods. [Manuscript submitted for publication].
- 438 Marchand, P. J. 1982. An index for evaluating the temperature stability of a subnivean  
439 environment. *The Journal of Wildlife Management* 46:518–520.
- 440 Monsimet, J., O. Devineau, J. Pétilion, and D. Lafage. 2020. Explicit integration of  
441 dispersal-related metrics improves predictions of SDM in predatory arthropods.  
442 *Scientific Reports* 10:1–12.
- 443 Mousseau, T. A. 1997. Ectotherms follow the converse to Bergmann’s rule. *Evolution*  
444 51:630–632.
- 445 Murphy, J., T. Rossolimo, and S. Adl. 2008. Cold-hardiness in the wolf spider *Pardosa*  
446 *groenlandica* (Thorell) with respect to thermal limits and dehydration. *The*  
447 *Journal of Arachnology* 36:213–215.
- 448 Nentwig, W. 2012. *Ecophysiology of spiders*. Springer Science & Business Media.
- 449 Overgaard, J., and H. A. MacMillan. 2017. The integrative physiology of insect chill  
450 tolerance. *Annual Review of Physiology* 79:187–208.



- 451 Paaijmans, K. P., R. L. Heinig, R. A. Seliga, J. I. Blanford, S. Blanford, C. C. Murdock,  
452 and M. B. Thomas. 2013. Temperature variation makes ectotherms more  
453 sensitive to climate change. *Global Change Biology* 19:2373–2380.
- 454 Pauli, J. N., B. Zuckerberg, J. P. Whiteman, and W. Porter. 2013. The subnivium: A  
455 deteriorating seasonal refugium. *Frontiers in Ecology and the Environment*  
456 11:260–267.
- 457 Penell, A., F. Raub, and H. Höfer. 2018. Estimating biomass from body size of  
458 European spiders based on regression models. *Journal of Arachnology* 46:413–  
459 419.
- 460 Pétilion, J., W. Montaigne, and D. Renault. 2009. Hypoxic coma as a strategy to  
461 survive inundation in a salt-marsh inhabiting spider. *Biology Letters* 5:442–445.
- 462 Pruitt, W. O. J. 1957. Observations on the bioclimate of some taiga mammals. *Arctic*  
463 10:130–138.
- 464 R Core Team. 2020. R: A Language and Environment for Statistical Computing. R  
465 Foundation for Statistical Computing, Vienna, Austria.
- 466 Renault, D., C. Salin, G. Vannier, and P. Vernon. 2002. Survival at low temperatures in  
467 insects: What is the ecological significance of the supercooling point?  
468 *CryoLetters* 23:217–228.

- 469 Schmidt, G. 1957. Einige notizen über *Dolomedes fimbriatus* (Cl.). Zoologischer  
470 Anzeiger 158:83–97.
- 471 Schneider, C. A., W. S. Rasband, and K. W. Eliceiri. 2012. NIH Image to ImageJ: 25  
472 years of image analysis. Nature Methods 9:671–675.
- 473 Schulte, P. M., T. M. Healy, and N. A. Fanguie. 2011. Thermal performance curves,  
474 phenotypic plasticity, and the time scales of temperature exposure. Integrative  
475 and Comparative Biology 51:691–702.
- 476 Seebacher, F., C. R. White, and C. E. Franklin. 2015. Physiological plasticity increases  
477 resilience of ectothermic animals to climate change. Nature Climate Change  
478 5:61–66.
- 479 Sinclair, B. J., A. Addo-Bediako, and S. L. Chown. 2003. Climatic variability and the  
480 evolution of insect freeze tolerance. Biological Reviews 78:181–195.
- 481 Sinclair, B. J., L. E. C. Alvarado, and L. V. Ferguson. 2015. An invitation to measure  
482 insect cold tolerance: Methods, approaches, and workflow. Journal of Thermal  
483 Biology 53:180–197.
- 484 Sinclair, B. J., A. G. Gibbs, W.-K. Lee, A. Rajamohan, S. P. Roberts, and J. J. Socha.  
485 2009. Synchrotron x-ray visualisation of ice formation in insects during lethal  
486 and non-lethal freezing. PLOS ONE 4:1–10.

- 487 Sinclair, B. J., C. M. Williams, and J. S. Terblanche. 2012. Variation in thermal  
488 performance among insect populations. *Physiological and biochemical zoology*  
489 85:594–606.
- 490 Slatyer, R. A., M. A. Nash, and A. A. Hoffmann. 2017. Measuring the effects of  
491 reduced snow cover on Australia’s alpine arthropods. *Austral Ecology* 42:844–  
492 857.
- 493 Smith, H. 2000. The Status and Conservation of the Fen Raft Spider (*Dolomedes*  
494 *plantarius*) at Redgrave and Lopham Fen National Nature Reserve, England.  
495 *Biological Conservation* 95:153–164.
- 496 Somero, G. N. 2012. The physiology of global change: Linking patterns to  
497 mechanisms. *Annual Review of Marine Science* 4:39–61.
- 498 Spence, J. R., and M. Zimmermann. 1998. Phenology and life-cycle of the fishing  
499 spider *Dolomedes Triton* Walckenaer (Araneae, Pisauridae) in Central Alberta.  
500 *Canadian Journal of Zoology* 76:295–309.
- 501 Spicer, J., and K. J. Gaston. 1999. *Physiological diversity and its ecological*  
502 *implications*. Blackwell Science. Oxford Academic, Oxford.
- 503 Sunday, J. M., A. E. Bates, and N. K. Dulvy. 2011. Global analysis of thermal tolerance  
504 and latitude in ectotherms. *Proceedings of the Royal Society B: Biological*  
505 *Sciences* 278:1823–1830.

- 506 Sømme, L. 1982. Supercooling and winter survival in terrestrial arthropods.  
507 *Comparative Biochemistry and Physiology Part A: Physiology* 73:519–543.
- 508 Vehtari, A., A. Gelman, and J. Gabry. 2017. Practical Bayesian model evaluation using  
509 leave-one-out cross-validation and WAIC. *Statistics and Computing* 27:1413–  
510 1432.
- 511 Vernon, P., and G. Vannier. 2002. Evolution of freezing susceptibility and freezing  
512 tolerance in terrestrial arthropods. *Comptes Rendus Biologies* 325:1185–1190.
- 513 Voorhies, W. A. V. 1996. Bergmann size clines: A simple explanation for their  
514 occurrence in ectotherms. *Evolution* 50:1259–1264.
- 515 Williams, C. M., H. A. L. Henry, and B. J. Sinclair. 2015. Cold truths: How winter drives  
516 responses of terrestrial organisms to climate change. *Biological Reviews*  
517 90:214–235.
- 518 Wipf, S., and C. Rixen. 2010. A review of snow manipulation experiments in Arctic and  
519 alpine tundra ecosystems. *Polar Research* 29:95–109.
- 520 World Conservation Monitoring Centre. 1996. The IUCN Red List of Threatened  
521 Species 1996.

## 522 Tables

523 Table 1: Description of the climatic conditions at the sampling sites, based on the  
524 Köppen-Geiger climate classification (Kottek et al. 2006). N: number of spiders tested;  
525 SCP: mean SCP  $\pm$  SD; Length: mean length of the carapace  $\pm$ SD; Mean temp: annual  
526 mean temperature; Diurnal range: mean diurnal range (extracted from Fick and Hijmans  
527 (2017)).

| Sites | Species              | N  | Country | Climate     | SCP (°C)         | Length (mm)     | Mean Temp | Diurnal range |
|-------|----------------------|----|---------|-------------|------------------|-----------------|-----------|---------------|
| C1    | <i>D. fimbriatus</i> | 24 | Norway  | Continental | -9.08 $\pm$ 0.45 | 4.13 $\pm$ 0.52 | 2.56      | 9.50          |
| C2    | <i>D. fimbriatus</i> | 24 | Sweden  | Continental | -9.06 $\pm$ 0.4  | 4.43 $\pm$ 0.56 | 5.52      | 8.54          |
| C3    | <i>D. plantarius</i> | 21 | Sweden  | Continental | -7.56 $\pm$ 0.32 | 5.36 $\pm$ 0.69 | 6.05      | 7.78          |
| T1    | <i>D. fimbriatus</i> | 26 | France  | Temperate   | -7.78 $\pm$ 0.4  | 4.62 $\pm$ 0.46 | 11.62     | 7.03          |
| T2    | <i>D. fimbriatus</i> | 24 | France  | Temperate   | -5.39 $\pm$ 0.4  | 4.44 $\pm$ 0.48 | 11.14     | 6.30          |

528

529 Table 2: Parameter estimates of the most accurate model explaining the SCP values  
530 between different climatic areas for *D. fimbriatus* (modClim, see appendix 1). CI: 89%  
531 credible intervals, pd: probability of direction, ROPE: percentage of the full region of  
532 practical equivalence. Diff: time difference between date of capture and date of test;  
533 Temperature: climate variable (continental climate in the intercept); Temperate:Body  
534 size: interactive effect of the climate and body size.

|                     | Estimate | CI low | CI high | pd   | ROPE (%) | Rhat |
|---------------------|----------|--------|---------|------|----------|------|
| (Intercept)         | -8.3     | -12.3  | -4.7    | 1.00 | 0.0      | 1.0  |
| Diff                | -0.3     | -0.4   | -0.2    | 1.00 | 23.1     | 1.0  |
| Temperate           | 8.1      | 3.2    | 12.8    | 0.99 | 0.4      | 1.0  |
| Body size           | 8.4      | 0.6    | 16.5    | 0.96 | 0.9      | 1.0  |
| Temperate:Body size | -14.3    | -24.7  | -2.8    | 0.98 | 0.4      | 1.0  |

535

536 Table 3: Parameter estimates of the most accurate model explaining the SCP values  
537 between the two species in continental climate (modSp, see appendix 2). CI: 89%  
538 credible intervals, pd: probability of direction, ROPE: percentage of the full region of  
539 practical equivalence. Diff: time difference between date of capture and date of test; *D.*  
540 *plantarius*: species variable (*D. fimbriatus* in the intercept); *D. plantarius*:Body size:  
541 interactive effect of species and body size.

|                                 | Estimate | CI low | CI high | pd   | ROPE (%) | Rhat |
|---------------------------------|----------|--------|---------|------|----------|------|
| (Intercept)                     | -9.77    | -13.8  | -5.6    | 1.00 | 0.0      | 1.0  |
| Diff                            | -0.22    | -0.4   | -0.0    | 0.97 | 42.8     | 1.0  |
| <i>D. plantarius</i>            | 4.80     | 0.1    | 9.4     | 0.95 | 1.6      | 1.0  |
| Body size                       | 9.10     | 2.0    | 15.9    | 0.98 | 0.5      | 1.0  |
| <i>D. plantarius</i> :Body size | -8.65    | -17.4  | 1.0     | 0.93 | 0.8      | 1.0  |

542

## 543 Figures

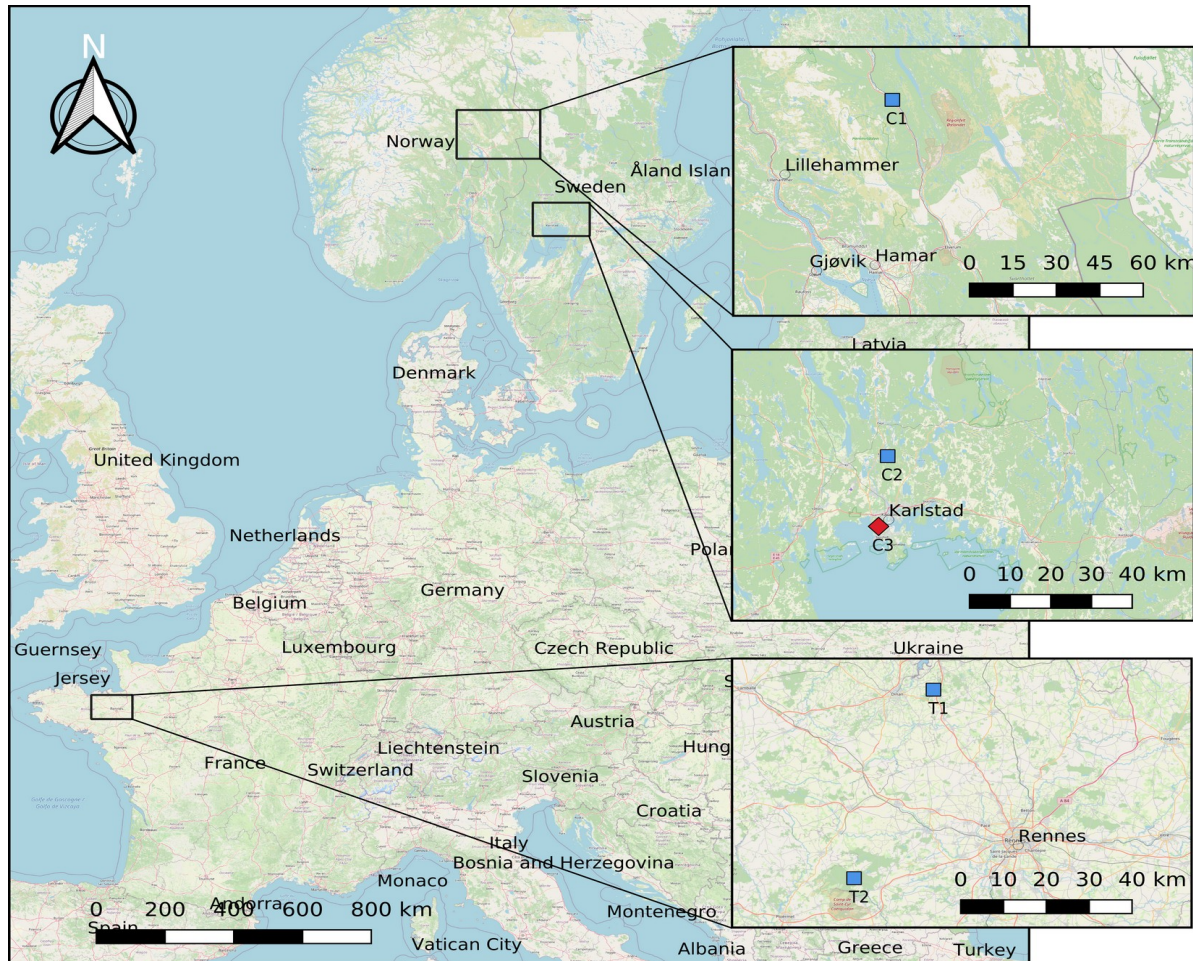

544 Figure 1: Location of sampling sites for *Dolomedes fimbriatus* (blue squares) and

545 *Dolomedes plantarius* (red square) in France and Fennoscandia.



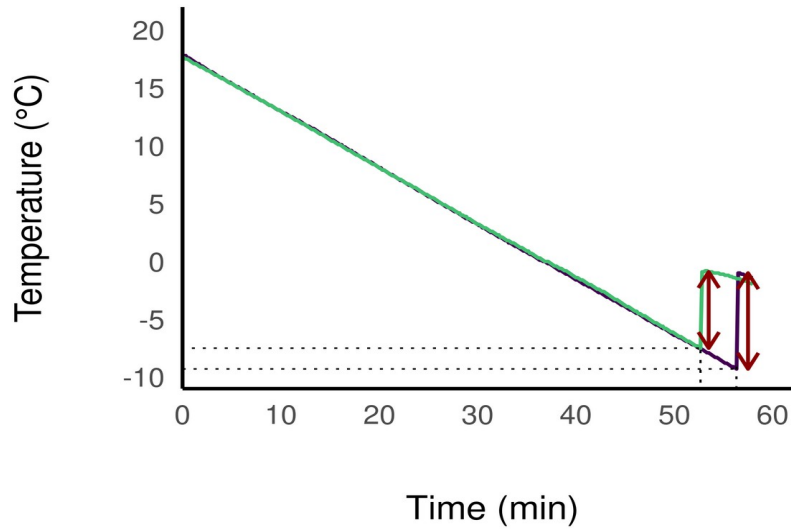

546 Figure 2: Cooling curves of *D. plantarius* (one spider from C3, in yellow) and *D.*  
547 *fimbriatus* (one spider from C2, in purple) recorded during a cooling experiment. The  
548 SCP (dotted line) is followed by the exotherm (dark-red arrows), a sudden increase in  
549 the measured temperature due to the release of latent heat linked to the phase change  
550 during freezing.

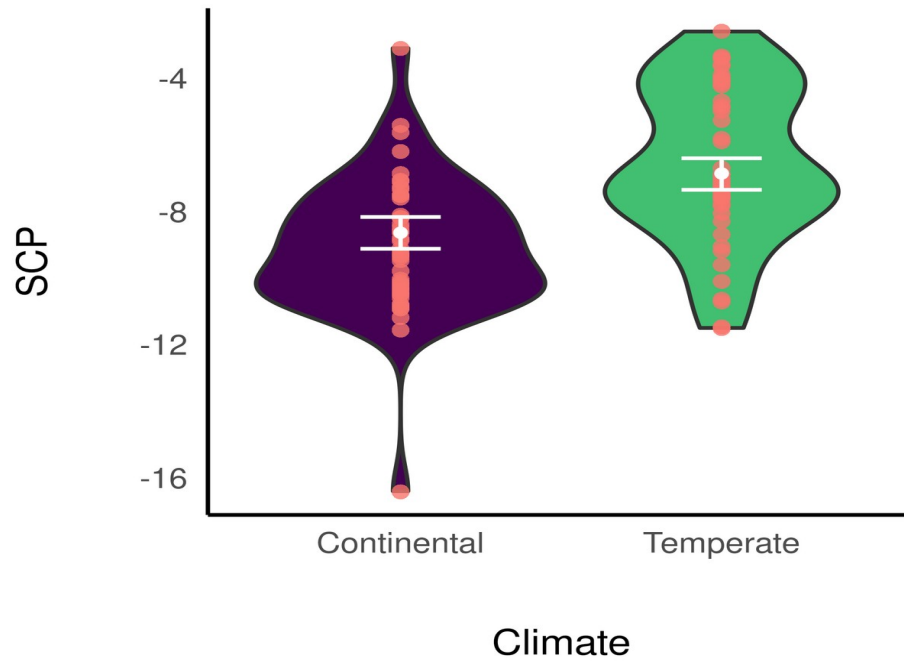

552 Figure 3: Marginal posterior means of SCP (white dot) estimated under modClim for the  
553 two different climatic areas and its 89% credible interval (white bar). Red dots represent  
554 the original data and the violin distributions represent a density plot.

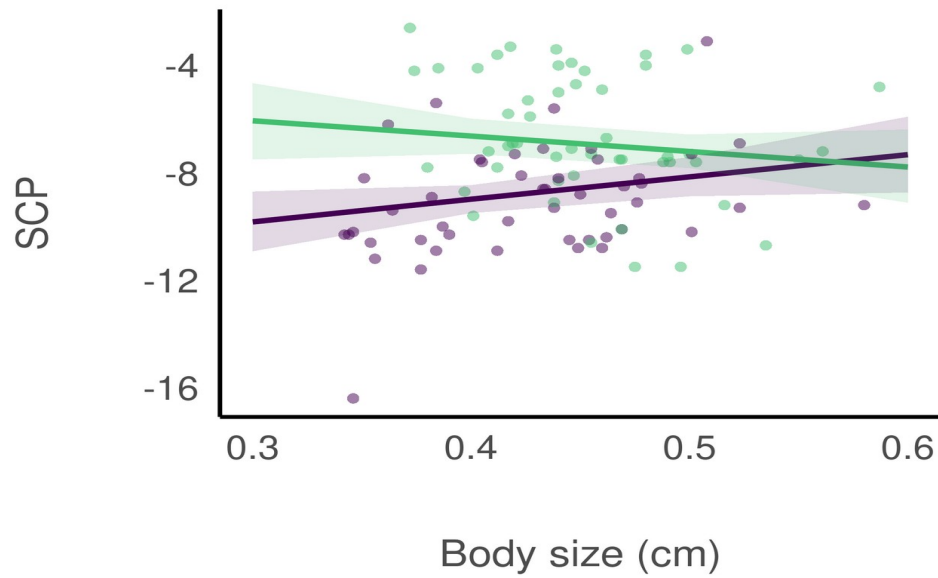

555 Figure 4: Predicted effect of *D. fimbriatus* body size on the SCP, and its 89% credible  
556 interval, for the two different climatic areas under modClim. Purple: predictions for the  
557 continental climate, green: predictions for the temperate climate; dots represent original  
558 data.

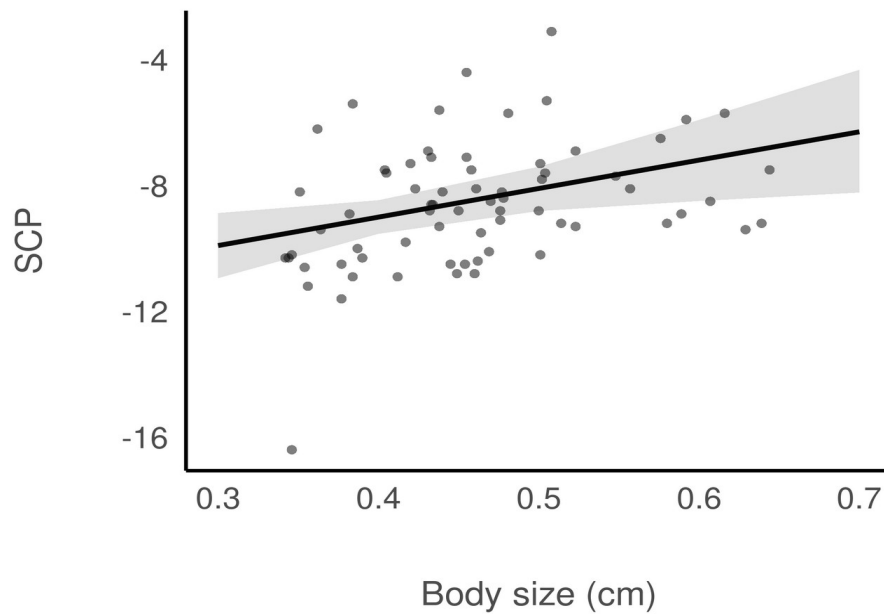

559 Figure 5: Predicted effect of body size of *D. plantarius* and *D. fimbriatus* on the SCP in  
560 Scandinavia, and its 89% credible interval, under modSp. Dots represent original data.
